# Supplementary material for: Scrub Typhus as a Cause of Acute Encephalitis Syndrome, Gorakhpur, Uttar Pradesh, India
Source: PubMed Central journal article supplement (PMC5547812; doi:10.3201/eid2308.170025), 2017-08
Supplement: 17-0025-Techapp-s1.pdf [file 17-0025-Techapp-s1.pdf]

# Scrub Typhus as a Cause of Acute Encephalitis Syndrome, Gorakhpur, Uttar Pradesh, India

## Technical Appendix



**Technical Appendix Figure.** Distribution of optical density (OD) values for *Orientia tsutsugamushi* IgM among patients with scrub typhus and controls in study of acute encephalitis syndrome, Gorakhpur, Uttar Pradesh, India
